# Supplementary material for: FGF21 improves glucose homeostasis in an obese diabetes-prone mouse model independent of body fat changes
Source: PubMed Central journal article supplement (PMC6448882; doi:10.1007/s00125-017-4389-x), 2017-08-02
Supplement: 125_2017_4389_MOESM1_ESM.pdf [file 125_2017_4389_MOESM1_ESM.pdf]

**ESM Table 1: Composition of diets**

| <b>- CH (#105789, Altromin; Lage, Germany)</b> |               |                                                        |
|------------------------------------------------|---------------|--------------------------------------------------------|
| <b>Ingredient</b>                              | <b>%, w/w</b> |                                                        |
| Crude protein                                  | 32.1          |                                                        |
| Crude fat                                      | 30.6          |                                                        |
| Crude fibre                                    | 20.2          |                                                        |
| Crude ash                                      | 5.6           |                                                        |
| Moisture                                       | 4.2           |                                                        |
| N-free extract                                 | 7.3           |                                                        |
| <b>+ CH (self-made)</b>                        |               |                                                        |
| <b>Ingredient</b>                              | <b>%, w/w</b> | <b>Manufacturer</b>                                    |
| Casein                                         | 20            | Bayerische Milchindustrie eG; Landshut, Germany        |
| Palm fat                                       | 13.5          | Ostthüringer Nahrungsmittelwerk; Gera, Germany         |
| Margarine                                      | 13.5          | Ostthüringer Nahrungsmittelwerk; Gera, Germany         |
| Safflower oil                                  | 0.5           | Kunella Feinkost; Cottbus, Germany                     |
| Linseed oil                                    | 0.5           | Kunella Feinkost; Cottbus, Germany                     |
| Microcellulose                                 | 5             | J. Rettenmaier und Söhne; Ellwangen-Holzmühle, Germany |
| Mineral mixture                                | 5             | Altromin; Lage, Germany                                |
| Vitamin mixture                                | 2             | Altromin; Lage, Germany                                |
| Sucrose                                        | 10            | Pfeifer & Langen KG; Cologne, Germany                  |
| Starch                                         | 30            | Kröner Stärke; Ibbenbüren, Germany                     |

| <b>Macronutrient content</b>      | <b>- CH</b> | <b>+ CH</b> |
|-----------------------------------|-------------|-------------|
| Energy density (kJ/g)             | 16.8        | 21.9        |
| Protein (% of total energy)       | 31          | 16.2        |
| Carbohydrates (% of total energy) | 0           | 32.4        |
| Fat (% of total energy)           | 68          | 51.4        |

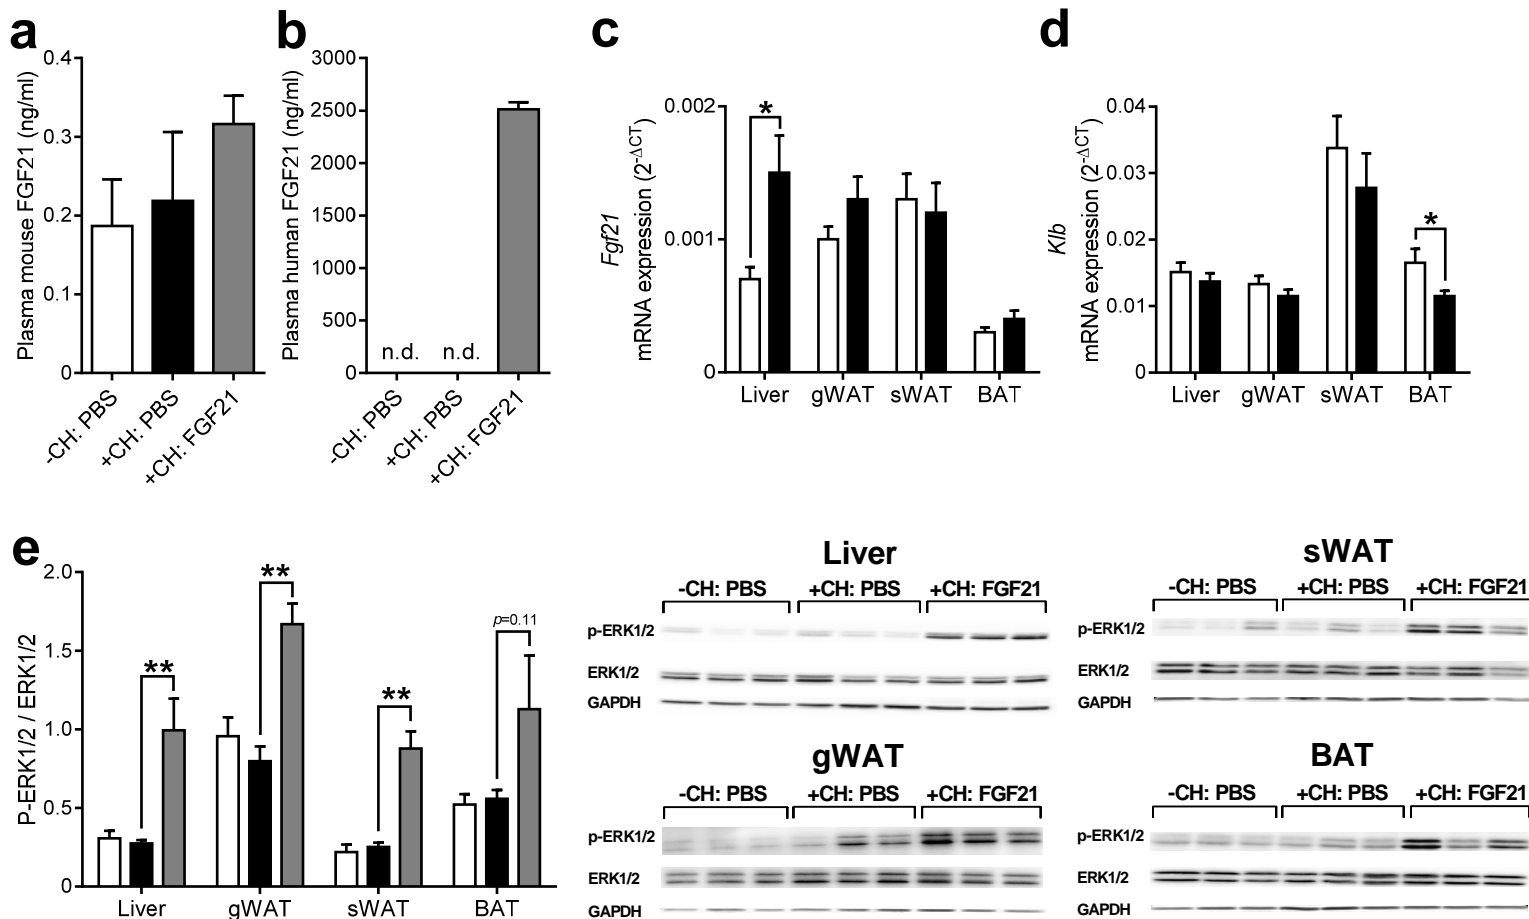

### ESM Figure 1. FGF21 stimulates phosphorylation of ERK1/2 in liver and fat of NZO mice.

At the age of 5 weeks, NZO mice were placed on a carbohydrate-free high-fat diet (-CH) for 13 weeks, at which point a random subgroup of animals was transferred to a carbohydrate-containing high-fat diet (+CH) for 2 weeks. (a) Random plasma FGF21 concentrations 3 days before the diet switch and (b) plasma human FGF21 one hour after sc injection at day 0. Gene expression of (c) *Fgf21* and (d) *Klfb* in liver, gWAT, sWAT, and BAT of NZO mice 14 days after the diet switch. 14 days after the diet switch, 4-hour fasted animals were treated subcutaneously with PBS or rhFGF21 (1  $\mu$ g/BW g) 30 min before sacrifice. (e) Western blot of ERK1/2 phosphorylation in liver, gWAT, sWAT, and BAT. White bars, -CH: PBS; black bars, +CH: PBS; grey bars, +CH: FGF21. Data are presented as mean  $\pm$  SEM ( $n = 6-7$ /group). Differences compared with +CH:PBS group were calculated by one-way ANOVA (a, b, e) and two-tailed *t*-test (c, d), respectively. \* $p < 0.05$ ; \*\* $p < 0.01$ .

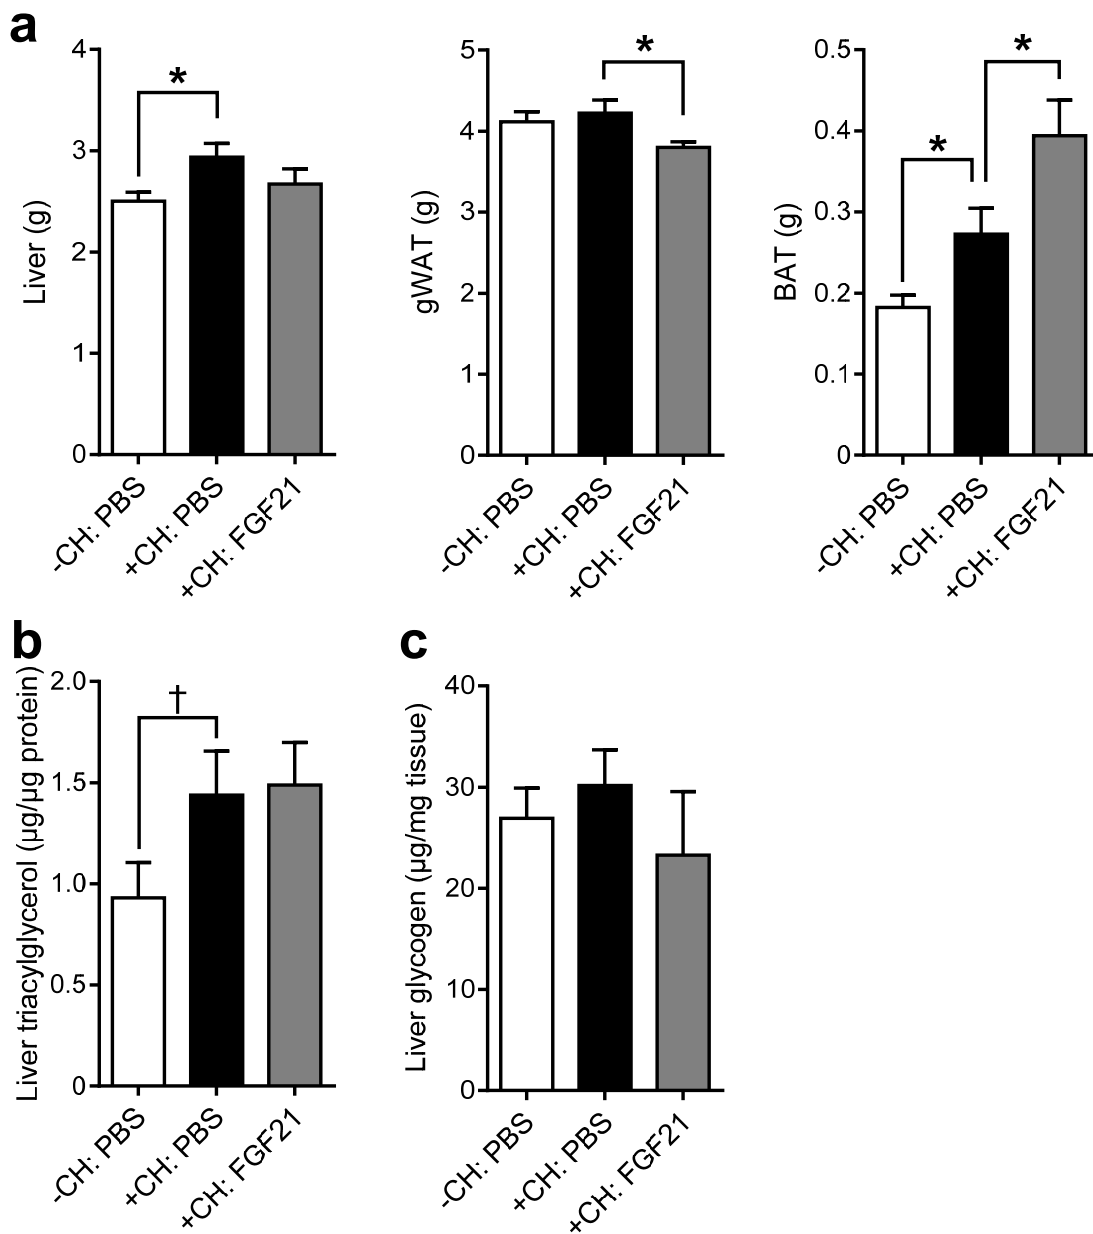

**ESM Figure 2. FGF21 modifies changes in organ mass induced by carbohydrate feeding in NZO mice.** At the age of 5 weeks, NZO mice were placed on a carbohydrate-free high-fat diet (-CH) for 13 weeks, at which point a random subgroup of animals was transferred to a carbohydrate-containing high-fat diet (+CH) for 2 weeks. Animals were treated subcutaneously with PBS or rhFGF21 (1  $\mu\text{g}/\text{BW}$  g) starting 3 days before the diet switch and ending 7 days after the diet switch. 14 days after the diet switch, 4-hour fasted animals were sacrificed. Weight of (a) liver, gWAT, and BAT. (b) Liver triacylglycerol and (c) glycogen content. Data are presented as mean  $\pm$  SEM ( $n = 6-7/\text{group}$ ). Differences compared with +CH:PBS group were calculated by one-way ANOVA. <sup>†</sup> $0.1 > p > 0.05$ ; \* $p < 0.05$ .

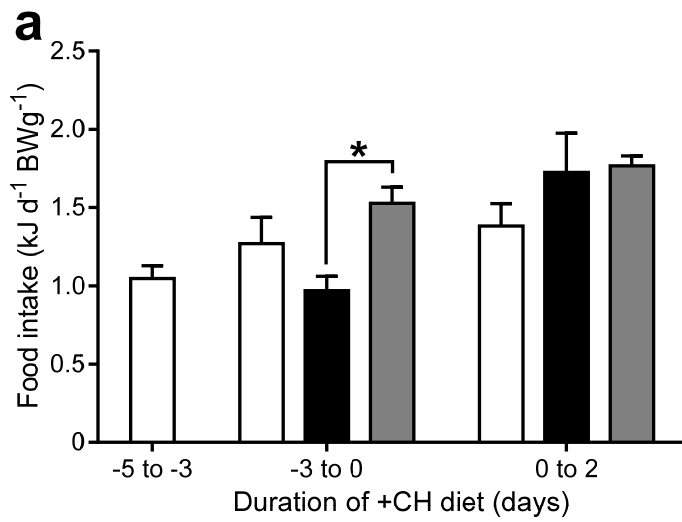

**ESM Figure 3. FGF21 transiently increases food intake in NZO mice.** At the age of 5 weeks, NZO mice were placed on a carbohydrate-free high-fat diet (-CH) for 13 weeks, at which point a random subgroup of animals was transferred to a carbohydrate-containing high-fat diet (+CH) for 2 days. Animals were treated subcutaneously with PBS or rhFGF21 (1  $\mu$ g/BW g) starting 3 days before the diet switch and ending 2 days after the diet switch. (a) Food intake over different periods of time. White bars, -CH: PBS; black bars, +CH: PBS; grey bars, +CH: FGF21. Data are presented as mean  $\pm$  SEM ( $n = 4$ /group). Differences compared with +CH:PBS group were calculated by one-way ANOVA. \*\* $p < 0.01$ .
